# Supplementary material for: Xylitol and Maltitol Improve the Rheological Property of Kappa-Carrageenan
Source: MDPI journal article supplement (doi:10.3390/foods11010051), 2021-12-27
Supplement: s1 [file s1]

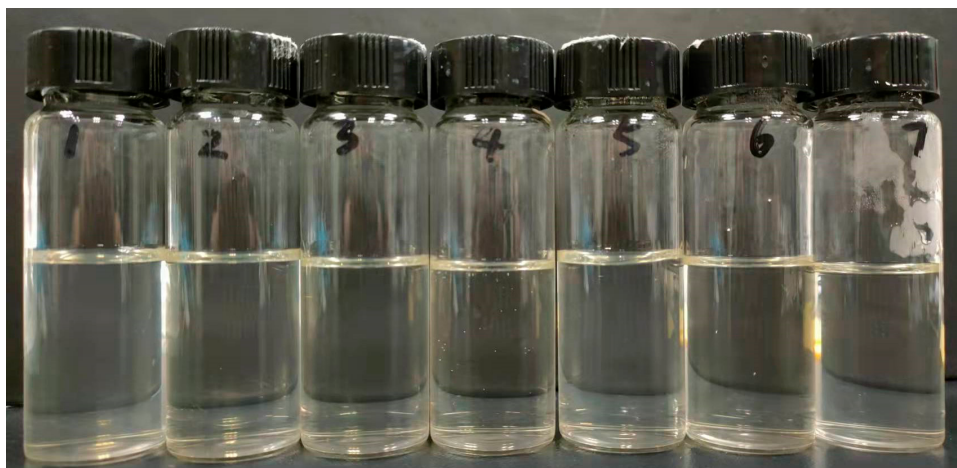

Figure S1. Pictures of analyzed gels. Samples from left to right are 2 wt%  $\kappa$ -carrageenan ( $\kappa$ -C) with the addition of 0 wt% xylitol and maltitol, 10 wt% xylitol addition, 20 wt% xylitol addition, 30 wt% xylitol addition, 10 wt% maltitol addition, 20 wt% maltitol addition, and 30 wt% maltitol addition.
